# Supplementary material for: Liver Transplantation for Unresectable Intrahepatic Cholangiocarcinoma: The Role of Sequencing Genetic Profiling
Source: MDPI journal article supplement (doi:10.3390/cancers13236049), 2021-12-01
Supplement: s1 [file s1]

# Supplementary Materials: Liver Transplantation for Unresectable Intrahepatic Cholangiocarcinoma: The Role of Sequencing Genetic Profiling

Salvatore Gruttadauria, Floriana Barbera, Duilio Pagano, Rosa Liotta, Roberto Miraglia, Marco Barbara, Maria Grazia Bavetta, Calogero Cammà, Ioannis Petridis, Daniele Di Carlo, Pier Giulio Conaldi and Fabrizio Di Francesco

**Table S1.** Genes covered by SureSelect Cancer All-In-One (AIO) Solid Tumor Assay.

|               |               |               |               |                |
|---------------|---------------|---------------|---------------|----------------|
| <i>ABL1</i>   | <i>CDKN2A</i> | <i>FGFR4</i>  | <i>MLH1</i>   | <i>RAF1</i>    |
| <i>AKT1</i>   | <i>CDKN2B</i> | <i>FOXL2</i>  | <i>MSH2</i>   | <i>RB1</i>     |
| <i>ALK</i>    | <i>CIC</i>    | <i>GNA11</i>  | <i>MSH6</i>   | <i>RET</i>     |
| <i>APC</i>    | <i>CSF1R</i>  | <i>GNAQ</i>   | <i>MTOR</i>   | <i>RIT1</i>    |
| <i>AR</i>     | <i>CTNNB1</i> | <i>GNAS</i>   | <i>MYC</i>    | <i>ROS1</i>    |
| <i>ARAF</i>   | <i>DDR2</i>   | <i>HNF1A</i>  | <i>MYCN</i>   | <i>SMAD4</i>   |
| <i>ARID1A</i> | <i>DNMT3A</i> | <i>HRAS</i>   | <i>MYD88</i>  | <i>SMARCB1</i> |
| <i>ATM</i>    | <i>EGFR</i>   | <i>IDH1</i>   | <i>NF1</i>    | <i>SMO</i>     |
| <i>BCL2</i>   | <i>ERBB2</i>  | <i>IDH2</i>   | <i>NF2</i>    | <i>SRC</i>     |
| <i>BCR</i>    | <i>ERBB3</i>  | <i>JAK2</i>   | <i>NFE2L2</i> | <i>STK11</i>   |
| <i>BRAF</i>   | <i>ERBB4</i>  | <i>JAK3</i>   | <i>NOTCH1</i> | <i>TERT</i>    |
| <i>BRCA1</i>  | <i>ESR1</i>   | <i>KDR</i>    | <i>NRAS</i>   | <i>TMPRSS2</i> |
| <i>BRCA2</i>  | <i>ETV1</i>   | <i>KIT</i>    | <i>NTRK1</i>  | <i>TP53</i>    |
| <i>CCND1</i>  | <i>ETV4</i>   | <i>KMT2A</i>  | <i>PDGFRA</i> | <i>TSC1</i>    |
| <i>CCND2</i>  | <i>ETV6</i>   | <i>KRAS</i>   | <i>PDGFRB</i> | <i>TSC2</i>    |
| <i>CCNE1</i>  | <i>EZH2</i>   | <i>MAP2K1</i> | <i>PIK3CA</i> | <i>VEGFA</i>   |
| <i>CD274</i>  | <i>FBXW7</i>  | <i>MAP2K2</i> | <i>PIK3R1</i> | <i>VHL</i>     |
| <i>CDH1</i>   | <i>FGFR1</i>  | <i>MAP2K4</i> | <i>PTCH1</i>  | <i>WT1</i>     |
| <i>CDK4</i>   | <i>FGFR2</i>  | <i>MDM2</i>   | <i>PTEN</i>   |                |
| <i>CDK6</i>   | <i>FGFR3</i>  | <i>MET</i>    | <i>PTPN11</i> |                |

**Table S2.** List of all pathogenic or likely-pathogenic mutations found in iCCA tissue samples from 12 patients who underwent liver transplantation.

| Gene (Transcript) | cDNA (cNomen) | Patient | Pathway |
|-------------------|---------------|---------|---------|
| KRAS(NM_033360.4) | c.183A>C      | 1       | MAPK    |
| KRAS(NM_033360.4) | c.35G>A       | 2       | MAPK    |
| KRAS(NM_033360.4) | c.35G>T       | 3       | MAPK    |
| KRAS(NM_033360.4) | c.35G>T       | 4       | MAPK    |
| KRAS(NM_033360.4) | c.35G>A       | 5       | MAPK    |
| KRAS(NM_033360.4) | c.35G>T       | 6       | MAPK    |
| KRAS(NM_033360.4) | c.35G>A       | 7       | MAPK    |
| KRAS(NM_033360.4) | c.35G>A       | 9       | MAPK    |
| KRAS(NM_033360.4) | c.216G>A      | 9       | MAPK    |
| KRAS(NM_033360.4) | c.216G>A      | 11      | MAPK    |

|                        |            |    |          |
|------------------------|------------|----|----------|
| NF1(NM_001042492.2)    | c.3313A>T  | 2  | MAPK     |
| NF1(NM_001042492.2)    | c.3144G>T  | 2  | MAPK     |
| NF1(NM_001042492.2)    | c.808C>T   | 5  | MAPK     |
| NF1(NM_001042492.2)    | c.4273G>T  | 6  | MAPK     |
| NF1(NM_001042492.2)    | c.5788T>C  | 7  | MAPK     |
| BRAF(NM_001374258.1)   | c.144G>A   | 1  | MAPK     |
| BRAF(NM_001374258.1)   | c.1039C>T  | 4  | MAPK     |
| BRAF(NM_001374258.1)   | c.1531G>T  | 9  | MAPK     |
| ERBB4(NM_005235.3)     | c.1818G>T  | 9  | MAPK     |
| ERBB4(NM_005235.3)     | c.3902A>G  | 12 | MAPK     |
| KIT(NM_000222.2)       | c.811C>T   | 4  | MAPK     |
| KIT(NM_000222.2)       | c.2008A>T  | 7  | MAPK     |
| FGFR2(NM_022970.3)     | c.2063G>A  | 5  | MAPK     |
| FGFR3(NM_001354809.2)  | c.1849A>G  | 12 | MAPK     |
| HRAS(NM_176795.4)      | c.34G>A    | 5  | MAPK     |
| MAP2K4(NM_001281435.2) | c.779G>A   | 4  | MAPK     |
| MET(NM_000245.4)       | c.3629G>A  | 12 | MAPK     |
| ATM(NM_000051.3)       | c.283C>T   | 1  | P53      |
| ATM(NM_000051.3)       | c.6448G>A  | 1  | P53      |
| ATM(NM_000051.3)       | c.7472G>T  | 4  | P53      |
| ATM(NM_000051.3)       | c.8254A>T  | 4  | P53      |
| ATM(NM_000051.3)       | c.5908C>T  | 5  | P53      |
| ATM(NM_000051.3)       | c.1715T>C  | 5  | P53      |
| ATM(NM_000051.3)       | c.967A>G   | 7  | P53      |
| ATM(NM_000051.3)       | c.5697C>A  | 9  | P53      |
| ATM(NM_000051.3)       | c.4577C>T  | 9  | P53      |
| ATM(NM_000051.3)       | c.4906C>T  | 12 | P53      |
| CDKN2A(NM_001195132.1) | c.194T>C   | 1  | P53      |
| CDKN2A(NM_001195132.1) | c.262G>T   | 2  | P53      |
| CDKN2A(NM_001195132.1) | c.194T>C   | 10 | P53      |
| CDKN2A(NM_001195132.1) | c.194T>C   | 12 | P53      |
| RB1(NM_000321.2)       | c.1544C>T  | 6  | P53      |
| RB1(NM_000321.2)       | c.2014G>T  | 11 | P53      |
| TP53(NM_001126114.2)   | c.818G>A   | 10 | P53      |
| PIK3CA(NM_006218.2)    | c.262C>T   | 2  | PI3K-Akt |
| PIK3CA(NM_006218.2)    | c.2113C>T  | 2  | PI3K-Akt |
| PIK3CA(NM_006218.2)    | c.2119G>A  | 6  | PI3K-Akt |
| PIK3CA(NM_006218.2)    | c.353G>A   | 7  | PI3K-Akt |
| PIK3CA(NM_006218.2)    | c.1624G>A  | 7  | PI3K-Akt |
| PIK3CA(NM_006218.2)    | c.1067T>C  | 7  | PI3K-Akt |
| PIK3CA(NM_006218.2)    | c.2119G>A  | 7  | PI3K-Akt |
| PIK3CA(NM_006218.2)    | c.1035T>A  | 9  | PI3K-Akt |
| PTEN(NM_001304718.2)   | c.435+1G>T | 3  | PI3K-Akt |
| PTEN(NM_000314.4)      | c.493G>T   | 6  | PI3K-Akt |
| PTEN(NM_000314.4)      | c.640C>T   | 9  | PI3K-Akt |
| PTEN(NM_001304717.5)   | c.927G>A   | 12 | PI3K-Akt |
| MTOR(NM_004958.3)      | c.526G>A   | 5  | PI3K-Akt |
| MTOR(NM_004958.3)      | c.6577C>T  | 12 | PI3K-Akt |
| APC(NM_001354895.2)    | c.1500T>A  | 1  | Wnt      |

|                       |           |    |                      |
|-----------------------|-----------|----|----------------------|
| APC(NM_001354895.2)   | c.706C>T  | 3  | Wnt                  |
| APC(NM_001354895.2)   | c.1624C>T | 3  | Wnt                  |
| APC(NM_001354895.2)   | c.1658G>A | 4  | Wnt                  |
| APC(NM_001354895.2)   | c.4508C>A | 4  | Wnt                  |
| APC(NM_001354895.2)   | c.471G>A  | 6  | Wnt                  |
| CTNNB1(NM_001904.4)   | c.1040T>C | 4  | Wnt                  |
| CTNNB1(NM_001904.4)   | c.1628C>T | 5  | Wnt                  |
| CTNNB1(NM_001904.4)   | c.1955C>T | 12 | Wnt                  |
| GNAS(NM_080425.3)     | c.2531G>A | 1  | cAMP                 |
| GNAS(NM_080425.3)     | c.2530C>T | 3  | cAMP                 |
| GNAS(NM_080425.3)     | c.2531G>A | 5  | cAMP                 |
| GNAS(NM_080425.3)     | c.2531G>A | 9  | cAMP                 |
| GNAS(NM_080425.3)     | c.2531G>A | 11 | cAMP                 |
| GNA11(NM_002067.5)    | c.196G>A  | 5  | cAMP                 |
| GNA11(NM_002067.5)    | c.412G>T  | 11 | cAMP                 |
| GNA11(NM_002067.5)    | c.785C>A  | 12 | cAMP                 |
| GNAQ(NM_002072.5)     | c.303C>A  | 2  | cAMP                 |
| ARID1A(NM_006015.4)   | c.5975C>T | 5  | Chromatin            |
| ARID1A(NM_006015.4)   | c.3219G>A | 5  | Chromatin            |
| ARID1A(NM_006015.4)   | c.3562C>T | 5  | Chromatin            |
| ARID1A(NM_006015.4)   | c.4024C>T | 5  | Chromatin            |
| ARID1A(NM_006015.4)   | c.880A>C  | 6  | Chromatin            |
| ARID1A(NM_006015.4)   | c.5372C>A | 12 | Chromatin            |
| IDH1(NM_001282387.1)  | c.473C>T  | 2  | EpigeneticRegulation |
| IDH1(NM_001282387.1)  | c.481G>A  | 6  | EpigeneticRegulation |
| IDH1(NM_001282387.1)  | c.394C>T  | 8  | EpigeneticRegulation |
| IDH1(NM_001282387.1)  | c.1004C>T | 9  | EpigeneticRegulation |
| KMT2A(NM_001197104.1) | c.5383G>A | 4  | EpigeneticRegulation |
| KMT2A(NM_001197104.1) | c.5755G>A | 12 | EpigeneticRegulation |
| FBXW7(NM_001349798.2) | c.1160T>A | 10 | Notch                |
| NOTCH1(NM_017617.5)   | c.7171C>T | 12 | Notch                |
| BRCA2(NM_000059.3)    | c.3853G>T | 7  | DNARepair            |
| SMAD4(NM_005359.5)    | c.538C>T  | 12 | TGF-Beta             |
